# Supplementary material for: In vitro discovery of promising anti-cancer drug combinations using iterative maximisation of a therapeutic index
Source: PubMed Central journal article supplement (PMC4585751; doi:10.1038/srep14118), 2015-09-22
Supplement: srep14118-s2.pdf [file srep14118-s2.pdf]

# Supplementary Methods Part I: In vitro discovery of promising anti-cancer drug combinations using maximization of a therapeutic index

M. Kashif<sup>1</sup>, C. Andersson<sup>1</sup>, S. Hassan<sup>1</sup>, H. Karlsson<sup>1</sup>, W. Senkowski<sup>1</sup>,  
M. Fryknäs,<sup>1</sup> Nygren<sup>2</sup>, R. Larsson<sup>1</sup>, M.G. Gustafsson<sup>1,\*</sup>

Uppsala University, Dept Medical Sciences Cancer Pharmacology and Computational Medicine,  
Academic Hospital, 751 85 Uppsala, Sweden

\*Corresponding author: Mats.Gustafsson@medsci.uu.se

August 13, 2015

## 1 Brief Description

This supplement includes gene expression analysis of combination (17-AAG, Afungin, Trichostatin A), statistical variability calculations and performance monitoring of experimental/computational pipeline.

## 2 Gene expression analysis

### 2.1 Extraction of combination (17-AAG, Afungin, Trichostatin A) differential gene expression

Gene expression analysis of CRC cell line HCT116 treated with combination (17-AAG, Afungin, Trichostatin A) for 6 hours and untreated control was made by using Affymetrix GeneChip<sup>®</sup> expression arrays (Human Genome U 133 Plus 2.0). Raw data was normalized in the free software Expression Console provided by Affymetrix (<http://www.affymetrix.com>) using the MAS 5.0 algorithm. Only those probe set IDs were selected in combination differential gene expression signature (see supplementary Material Gene Expression Data) where there was two fold changes in the ratio of treated vs control ( $\text{abs}[\log_2(\text{treated}/\text{control})] > 1$ ).

### 2.2 Connectivity Map

Connectivity Map version 2 (CMap02), (<https://www.broadinstitute.org/cmap/>) is a database of more than 7,000 expression profiles resulted with treatment of 1309 compounds. Combination differential expression was searched in CMap02 for similarities. Detailed results are available in the Supplementary Material Gene Expression Data where it can be seen that most of the top ranked compounds like monorden, alvespimycin, tanespimycin and geldanamycin are proteotoxic and HSP90 inhibitors.

### 2.3 MetaCore<sup>TM</sup>

Analyses using MetaCore<sup>TM</sup> support the CMap02 based findings that the combination initiates a protein folding response to unfolded proteins ( $p=1.021E-08$ ) via HSPs.

### 2.4 g:Profiler

g:Profiler [1, 2] is a functional annotation tool and associates the combination initiated response to unfolded proteins ( $p=0.001$ ).

## 2.5 GFP construct for analysis of protein mistolding/unfolding

Bioinformatics analysis of the gene expression change induced by the combination suggests that the combination is proteotoxic making protein mis/unfolded that subsequently cause initiation of cellular responses to unfolded proteins. To test this effect an engineered melanoma cell line MelJuso<sup>YFP</sup> was treated with the combination. This cell line becomes fluorescent [3] if unfolded proteins are accumulated. MelJuso<sup>YFP</sup> cells exposed to the combination were imaged using time-lapse microscopy (IncuCyte FLR) every 2 hour (see Supplementary Movie S1). There was no or very little fluorescent coming out from MelJuso<sup>YFP</sup>. Also, the known HSP90 inhibitor 17AAG did not show any response (Supplementary Movie S2). However, the positive control Bortezomib, a proteasome inhibitor, caused the cells to become green (Supplementary Movie S3). In conclusion, further investigations (perhaps with more sensitive models) are needed to fully understand the mechanism of action of the combination.

## 3 Calculations of statistical variability

### 3.1 Calculation of variability for the first experiment using MACS

During this experiment, 13 clinically relevant cytotoxic drugs were used to find out the combination that provide the maximum therapeutic index when treated against model normal DLD-1KRAS/- and cancer cells DLD-1. For this purpose, the fitness value/therapeutic window  $F$  studied was defined as difference between survival indices  $S_n$  and  $S_c$  of normal and cancer cells respectively. Therefore the (population) variance  $\sigma_F^2$  associated with  $F$  is the sum of variances of normal and cancer cells denoted as  $\sigma_n^2$  and  $\sigma_c^2$  respectively. More formally:

**Case-I:**

$$\begin{cases} F = S_n - S_c \\ \sigma_F^2 = \sigma_n^2 + \sigma_c^2 \end{cases}$$

Often each experiment is performed  $N_r$  times in same batch. Let  $\bar{F}$  denote the mean of fitness values  $F(i)$  resulting from  $N_r$  repeated experiments for each combination. Similarly, let  $\sigma_F^2$  denote the (population) variance of  $\bar{F}$ . Then we can write

$$\begin{cases} \bar{F} = \frac{1}{N_r} \sum_{i=1}^{N_r} F(i) = \frac{1}{N_r} \sum_{i=1}^{N_r} S_n(i) - S_c(i) \\ \sigma_F^2 = \frac{1}{N_r} (\sigma_n^2 + \sigma_c^2) \end{cases}$$

**Estimates based on samples available:** In practice we need to estimate population variance from available samples. Let  $\hat{\sigma}_n^2$  denote the sample variance for normal cell lines and let  $\bar{S}_n$  denote the mean survival index for normal cell line. Finally let  $S_n(i)$  denote the  $i$ :th replicate's survival index for the normal cell line. These statistics are determined using the following standard expressions:

$$\begin{cases} \bar{S}_n = \frac{1}{N_r} \sum_{i=1}^{N_r} S_n(i) \\ \hat{\sigma}_n^2 = \frac{1}{N_r-1} \sum_{i=1}^{N_r} (S_n(i) - \bar{S}_n)^2 \end{cases}$$

Similarly, the corresponding variance estimate  $\hat{\sigma}_c^2$  for the cancer cell lines may be calculated as  $\hat{\sigma}_c^2 = \frac{1}{N_r-1} \sum_{i=1}^{N_r} (S_c(i) - \bar{S}_c)^2$  where  $\bar{S}_c = \frac{1}{N_r} \sum_{i=1}^{N_r} S_c(i)$ . Once the estimated  $\hat{\sigma}_n^2$  and  $\hat{\sigma}_c^2$  have been calculated it is straightforward to calculate sample variance  $\hat{\sigma}_F^2$  as  $\hat{\sigma}_F^2 = \frac{1}{N_r} (\hat{\sigma}_n^2 + \hat{\sigma}_c^2)$

### 3.2 Calculation of variability for the main experiment (TACS)

In this experiment 6 drugs were used and the pair of cell lines HCT116 and HT29 was regarded as cancer model while another cell line CCRF-CEM was used as normal/reference/toxicity model. Here the fitness  $F$  and the associated variance  $\sigma_F^2$  can be expressed as

## Case-II

$$\begin{cases} F = S_n - \frac{S_{c1} + S_{c2}}{2} \\ \sigma_F^2 = \sigma_n^2 + \frac{\sigma_{c1}^2 + \sigma_{c2}^2}{4} \end{cases}$$

where  $\sigma_{ci}^2$  denotes the variance of the survival of cancer cell line  $i$ . Now let  $N_r$  denote the number of times each experiment is performed in each batch and let  $N_B$  denote the number of batches. Therefore mean fitness  $\bar{F}$  can be calculated by averaging the individual fitness values  $F_{ib}$  as:

$$\bar{F} = \frac{1}{N_B} \sum_{b=1}^{N_B} \left( \frac{1}{N_r} \sum_{i=1}^{N_r} F_{ib} \right) = \frac{1}{N_B N_r} \sum_{b=1}^{N_B} \sum_{i=1}^{N_r} F_{ib}.$$

Thus the variance  $\sigma_{\bar{F}}^2$  for  $\bar{F}$  can be calculated as:

$$\sigma_{\bar{F}}^2 = \frac{1}{N_B N_r} \sigma_F^2 = \frac{1}{N_B N_r} \left( \sigma_n^2 + \frac{\sigma_{c1}^2 + \sigma_{c2}^2}{4} \right).$$

**Estimates based on samples available:** In practice we need to estimate population variance from available samples. This is achieved by the following standard expressions for the normal cells:

$$\begin{cases} \bar{S}_{nb} = \frac{1}{N_r} \sum_{i=1}^{N_r} S_n(i, b) \\ \hat{\sigma}_b^2 = \frac{1}{N_r - 1} \sum_{i=1}^{N_r} (S_n(i, b) - \bar{S}_{nb})^2 \\ \hat{\sigma}_n^2 = \frac{1}{N_B} \sum_{b=1}^{N_B} \hat{\sigma}_b^2 \end{cases}$$

For the cancer cell lines (j=1,2) one has:

$$\begin{cases} \bar{S}_{cj,b} = \frac{1}{N_r} \sum_{i=1}^{N_r} S_{cj}(i, b) \\ \hat{\sigma}_{cj,b}^2 = \frac{1}{N_r - 1} \sum_{i=1}^{N_r} (S_{cj}(i, b) - \bar{S}_{cj,b})^2 \\ \hat{\sigma}_{cj}^2 = \frac{1}{N_B} \sum_{b=1}^{N_B} \hat{\sigma}_{cj,b}^2 \end{cases}$$

Here  $\hat{\sigma}_{nb}^2$  denotes the sample variance for normal cell lines,  $\bar{S}_{nb}$  denotes the mean survival index in batch  $b$  for the normal/reference/toxicity cell line and  $S_n(i, b)$  is the corresponding survival index of experiment  $i$  in batch  $b$ . Finally the the variance estimate  $\hat{\sigma}_F^2$  is determined as

$$\hat{\sigma}_F^2 = \frac{1}{N_B N_r} \left( \hat{\sigma}_n^2 + \frac{\hat{\sigma}_{c1}^2 + \hat{\sigma}_{c2}^2}{4} \right)$$

where  $\hat{\sigma}_{cj}^2 = \frac{1}{N_r - 1} \sum_{i=1}^{N_r} (S_{cj}(i, b) - \bar{S}_{cj,b})^2$ ,  $S_{cj}(i, b)$  denotes the survival index of cell line  $j$  when in batch  $b$ , and  $\bar{S}_{cj,b}$  denotes the average survival index of cell line  $j$  in batch  $b$ .

### 3.3 Calculation of variance for several cancer cell lines

When comparing the mean survival index of 5 CRC cell lines and a normal model, the population variance of this mean survival index is calculated as follows. Let  $S_{i,j}$  denote the estimated survival index of CRC cell line  $i$  in the  $j$ th experiment ( $i = 1, 2, \dots, N$  and  $j = 1, 2, \dots, M$ ). In our case  $N = 5$  and  $M = 3$ . Then the sample mean  $\hat{\mu}_S$  of the survival index and its population variance  $\sigma_{\hat{\mu}_S}^2$  can be written

$$\begin{cases} \hat{\mu}_S = \frac{1}{N} \sum_{n=1}^N \left( \frac{1}{M} \sum_{j=1}^M S_{ij} \right) = \frac{1}{NM} \sum_{n=1}^N \sum_{j=1}^M S_{ij} \\ \sigma_{\hat{\mu}_S}^2 = \frac{1}{NM} \sigma_S^2 \end{cases}$$

where  $\sigma_S^2$  denotes the (population) variance of one single SI measurement.

**Estimates based on samples available:** In practice we need to estimate the population variance  $\sigma_{\hat{\mu}_S}^2$  from available samples. This is achieved by the following standard expressions where  $\hat{\mu}_S(i)$  denotes the sample mean based only on the  $M$  experimental SI values from the  $i$ th cell line:

$$\begin{cases} \hat{\mu}_S(i) = \frac{1}{M} \sum_{j=1}^M S_{i,j} \\ \hat{\sigma}_{S,i}^2 = \frac{1}{M-1} \sum_{j=1}^M (S_{i,j} - \hat{\mu}_S(i))^2 \\ \hat{\sigma}_S^2 = \frac{1}{N} \sum_{i=1}^N \hat{\sigma}_{S,i}^2 \end{cases}$$

Finally the the variance estimate  $\hat{\sigma}_S^2$  is determined as

$$\hat{\sigma}_S^2 = \frac{1}{NM} \hat{\sigma}_S^2 = \frac{1}{N^2M} \sum_{i=1}^N \hat{\sigma}_{S,i}^2.$$

## 4 Performance monitoring of experimental/computational pipeline

Performance of the pipeline was constantly monitored by comparison of survival indices produced with treatment of a combination when replicated within and multiple independent experiments. In the supplementary Figure S11, results are presented for those combinations that were replicated in multiple independent experiments, represented by Gen 0, Gen 1 and so on, and repeated 3 times in an experiment. In the first experiment using MACS (Panel A & B), intra experimental variability resulted after treatment of DLD-1 and DLD-1KRAS/- with five and four drug combinations is represented by standard error of mean (SEM) and gray scale bars represent mean survival in different independent experiments. Apparently no indication of large variability was found (In Panel A the standard deviation (SD) is only 1.1 SI units). For the second (main) experiment (Panel C-D), with already mentioned settings, the maximum SD was 5.25 SI units was calculated when cells lines HCT116, HT29 and CCRF-CEM were treated with combination *Rapamycin, 17-AAG, Trichostatin A*. For the combination *Sunitinib, 17-AAG, Afungin, Trichostatin A* the maximum SD was 3.5 SI units. The average SD across all combinations in second (main) experiment is 4.4 SI units suggesting that there is no strong variability. Additionally, the variability observed here is comparable to the variability reported by others in already published work where the end point analysis was also performed with FMCA [4]. The experimental variability observed in our pipeline was also comparable to those published by others when iterative search towards optimal drug combinations was performed, please refer to Figure 3 and supplementary material in [5].

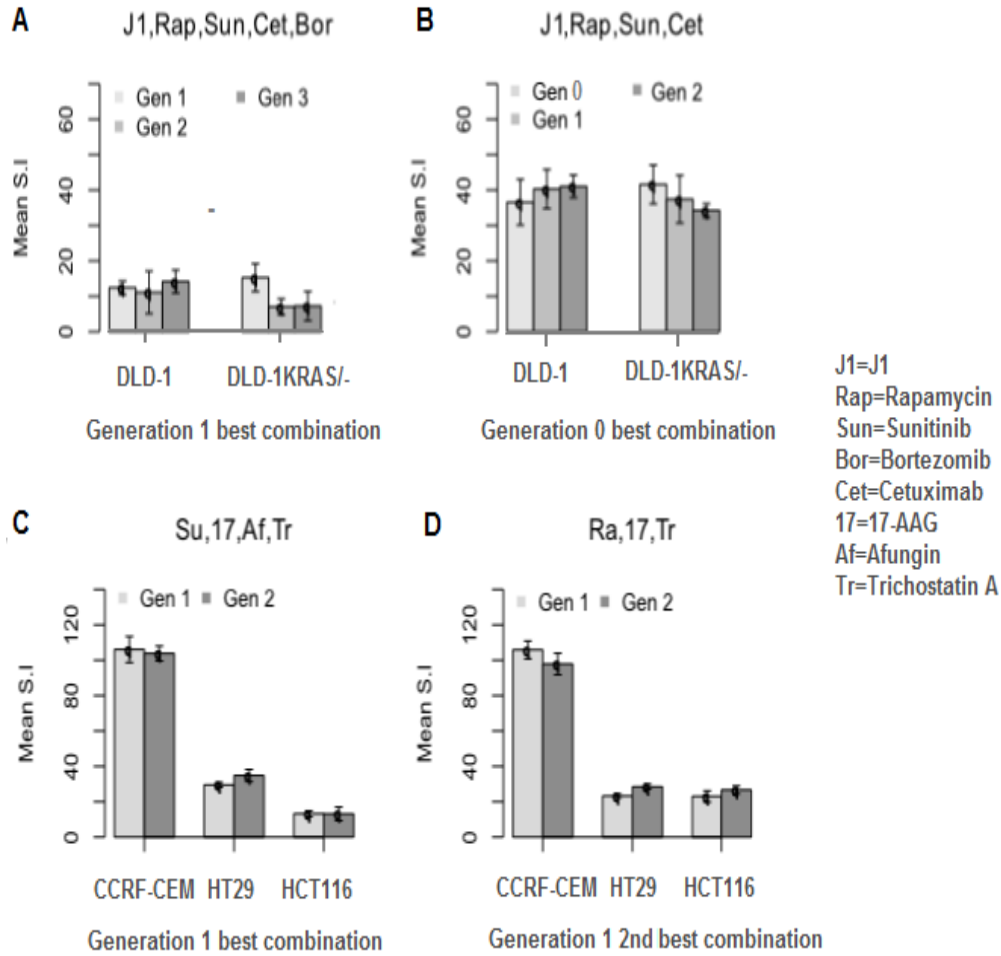

Figure S11: **Performance monitoring of experimental/computational pipeline.** **Panel A & B:** Survival of DLD-1 and DLD-1KRAS cell lines in multiple experiments when treated with five and four drug combinations replicated three times in an experiment. Intra experimental variability is represented by SEM and gray scale bars represent mean survival of same combination when repeated in multiple experiments. Apparently no indication of large variability is found. **Panel C & D:** Survival of the three cell lines CCRF-CEM, HCT116 and HT29 when treated with different length combinations in multiple independent experiments, only small variability can be found.

## References

- [1] Reimand J, Kull M, Peterson H, Hansen J, Vilo J. g:Profiler – a web-based toolset for functional profiling of gene lists from large-scale experiments. *NAR*. 2007;35:193–200.
- [2] Reimand J, Arak T, Vilo J. g:Profiler – a web server for functional interpretation of gene lists(2011 update). *Nucl Acids Res*. 2011;39(Suppl 2):W307–W315.

- [3] Benito-Menendez V, Verhoef LGGC, Masucci MG, Dantuma NP. Endoplasmic reticulum stress compromises the ubiquitin-proteasome system. *Hum Mol Genet.* 2005;14:2787–2799.
- [4] Lindhagen E, Nygren P, Larsson R. The Fluorometric microculture cytotoxicity assay. *Nat Protoc.* 2008;3:1364–1369.
- [5] Zinner RG, Barrett BL, Popova E, Damien P, Volgin AY, Gelovani JG, et al. Algorithmic guided screening of drug combinations of arbitrary size for activity against cancer cells. *Mol Cancer Ther.* 2009;8(3):521–532.

## Supplementary Methods II: In vitro discovery of promising anti-cancer drug combinations using maximization of a therapeutic index

M. Kashif<sup>1</sup>, C. Andersson<sup>1</sup>, S. Hassan<sup>1</sup>, H. Karlsson<sup>1</sup>, W. Senkowski<sup>1</sup>, M. Fryknäs<sup>1</sup>,  
P. Nygren<sup>2</sup>, R. Larsson<sup>1</sup>, M.G. Gustafsson<sup>1,\*</sup>

<sup>1</sup>Uppsala University, Dept. Medical Sciences Cancer Pharmacology and Computational  
Medicine, Academic Hospital, 751 85 Uppsala, Sweden

<sup>2</sup>Uppsala University, Dept of Radiology, Oncology and Radiation Science, Academic  
Hospital, SE-751 85 Uppsala, Sweden.

\*Corresponding author: Mats.Gustafsson@medsci.uu.se

### Brief Description:

This supplement includes Beckman Coulter® Biomek 2000 cherry picking programme and Matlab® code for prediction of IC10 and IC20 values from concentration response data.

Supplementary Figure S12: Cell plate layout.

### 1-Beckman Coulter® Biomek 2000 cherry picking programme

#### Plate layout

Cell Plate Layout

|   | 1 | 2   | 3   | 4   | 5   | 6  | 7   | 8  | 9  | 10    | 11 | 12 |
|---|---|-----|-----|-----|-----|----|-----|----|----|-------|----|----|
| A |   | M   | E   | D   | I   | U  | M   |    | O  | N     | L  | Y  |
| B | M | C4  | C8  | C10 | C13 | C  | C13 | C2 | C6 | D1.X1 | M  | M  |
| C | E | C5  | C13 | C11 | C7  | O  | C9  | C2 | C7 | D2.X1 | E  | E  |
| D | D | C3  | C8  | C11 | C3  | N  | C11 | C8 | C1 | D3 X1 | D  | D  |
| E | I | C6  | C6  | C10 | C1  | T  | C3  | C4 | C4 | D4 X1 | I  | I  |
| F | U | C5  | C10 | C14 | C12 | R  | C12 | C7 | C2 | D5 X1 | U  | U  |
| G | M | C12 | C5  | C1  | C14 | OL | C14 | C9 | C9 | D6 X1 | M  | M  |
| H |   | M   | E   | D   | I   | U  | M   |    | O  | N     | L  | Y  |

C=Combination, D=Drug, X=Dose  
B6 to G6=Cells with medium only, used as control  
B11 to G11= Wells with medium only, used as blank  
B10 to G10= Wells with all drugs with single dose  
B11 to G11= Wells with all drugs with six time dose

Figure S12. **Cell plate layout:** Total of 14 combinations was fitted on this plate with triplicates at random places. C stands for combination proceeded by combination number. Controls without any treatment are at column 6 and colored green. Empty control with medium only is column 1 and 11. Outer rows and columns were excluded from experiments to avoid (false) effects that could be produced in these wells by hydration.

```

1  #This script is written for Beckman Coulter® Biomek 2000 robotic platform (Biomek 2000) by
2  #using BioScript Pro.
3  # Terms used
4
5  #1- Biomek 2000 robotic arm= Robotic arm of Biomek 2000 where tips attach to, and that arm moves
6  #three dimensionally from source to destination.
7
8  #2- Biomek 2000 work surface= The space of Biomek 2000 where different labwares are placed.
9
10 #3-Labwares= Various wet-lab equipment like plates, racks, tubes etc. that can be used with Biomek
11 #2000.
12
13 #X, Y and Z coordinates= Viewing Biomek 2000 from front; X is the left-to-right axis across the #work
14 surface, Y is the front-to-back axis and Z is up-to-down axis
15
16 #Description of Programme
17
18 #This program transfers desired volumes (>2µl <100 µl) of drugs from source well to destination well.
19 #Biomek 2000 work surface is divided in to two rows that are further subdivided in to 6 locations each.
20 #Labwares are placed on these locations.
21
22 #Each drug transfer starts with attachment of new tip on robotic arm then aspiration of desired volume
23 #from source labware and finally dispensing in to destination well. Appendorf tubes were used as source
24 #labware and destination labwares were Nunc® 96 well plates with flat or v-shaped bottom.
25
26 Flag avoid 1
27
28 # Initialize labwares and their location on work surface
29 set source "Microfuge 24"      # Name of source labware to hold appendorf tubes
30 set sourcedrug B3              # Position of first "Microfuge 24" on work surface
31                               #used for drugs
32 set sourcemedium B1           # Position of second "Microfuge 24" on work surface
33                               #used for PBS
34 set dest "96-well flat"       # Name of destination labware
35 set destination B2           # Position of "96-well flat" on work surface
36
37 # Specify limits how deep tip can go in labwares
38 set srcheight 0.05; # Aspirate drug from 5% above bottom of source labware
39 set dstheight 0.6 ; # Dispense 60% above bottom of destination labware
40
41 # Aspiration delay. It is time that after aspiration of a drug; a tip will remain inside (liquid) drug well to
42 #make aspiration accurate.
43 set Adelay 0.5
44
45

```



```

37 # Amount of blow out air after dispensing drug. This air will help to drop any liquid attached to tip after
38 #dispension.
39 set blowoutair 15
40
41 # Extract coordinates of labwares and then calculates how deep tip can move in them.
42 # Extract coordinates of labwares
43 set src(SrcHt) [GetVal labware $source c_top] #Height of source labware
44 set src(SrcDp) [GetVal labware $source c_depth] #Depth of source labware
45
46 set dst(DstHt) [GetVal labware $dest c_top] #Height of destination labware
47 set dst(DstDp) [GetVal labware $dest c_depth] #Depth of destination labware
48
49 # Calculation of Z-axis values (How deep tips will go in the wells)
50 set srcZ [expr $src(SrcHt) - $src(SrcDp) + ( $srcheight * $src(SrcDp)) ]
51 set dstZ [expr $dst(DstHt) - $dst(DstDp) + ( $dstheight * $dst(DstDp)) ]
52
53 # Get the current tool attached to robotic arm and steps per microliter volume
54 set tool [GetVal system curtool pTool] # current tool attached to robotic arm
55 set step [GetVal tools $tool steps_per_microliter] # How many steps transfer motor will make per
56 # microliter
57
58 # Prepare transfer motor for aspiration
59 set move [expr $step * $tvolume] #Move transfer motor
60
61 # Specify destination plate layouts, see Figure S15 for details.
62 # Each combination is replicated on destination plate in wells those were selected (once) randomly at the
63 #beginning of whole set of experiments. Their positions are defined below in the array randomwells.
64
65 #Note about array definition:
66 # Array in BioScript Pro is defined by as
67 # set arrayname(index) value.
68 #or
69 # set arrayname list, Number of elements in the list should be even and every odd element is the index
70 # while even is value of that index
71
72 # Specify positions of replicate wells on destination plate.
73 set randomwells(1) 38; set randomwells(2) 21; set randomwells(3) 25; set randomwells(4) 6
74 set randomwells(5) 35; set randomwells(6) 13; set randomwells(7) 32; set randomwells(8) 26
75 set randomwells(9) 18; set randomwells(10) 15; set randomwells(11) 28; set randomwells(12) 27
76 set randomwells(13) 1; set randomwells(14) 37; set randomwells(15) 40; set randomwells(16) 46
77 set randomwells(17) 29; set randomwells(18) 23; set randomwells(19) 48; set randomwells(20) 7
78 set randomwells(21) 22; set randomwells(22) 34; set randomwells(23) 14; set randomwells(24) 11
79 set randomwells(25) 47; set randomwells(26) 8; set randomwells(27) 2; set randomwells(28) 20
80 set randomwells(29) 12; set randomwells(30) 42; set randomwells(31) 24; set randomwells(32)41
81 set randomwells(33) 45; set randomwells(34) 30; set randomwells(35) 3; set randomwells(36) 19

```

```

81 set randomwells(37) 10; set randomwells(38) 17; set randomwells(39) 33; set randomwells(40) 43
82 set randomwells(41) 36; set randomwells(42) 9; set randomwells(43) 16; set randomwells(44) 5
83 set randomwells(45) 4; set randomwells(46) 39; set randomwells(47) 31; set randomwells(48) 44
84
85 # Destination plate layout
86 set destinationwells(1) B2; set destinationwells(2) B3; set destinationwells(3) B4; set destinationwells(4)
87 B5
88 set destinationwells(5) B7; set destinationwells(6) B8; set destinationwells(7) B9; set destinationwells(8)
89 B10
90 set destinationwells(9) C2; set destinationwells(10) C3; set destinationwells(11) C4; set
91 destinationwells(12) C5
92 set destinationwells(13) C7; set destinationwells(14) C8; set destinationwells(15) C9; set
93 destinationwells(16) C10
94 set destinationwells(17) D2; set destinationwells(18) D3; set destinationwells(19) D4; set
95 destinationwells(20) D5
96 set destinationwells(21) D7; set destinationwells(22) D8; set destinationwells(23) D9; set
97 destinationwells(24) D10
98 set destinationwells(25) E2; set destinationwells(26) E3; set destinationwells(27) E4; set
99 destinationwells(28) E5
100 set destinationwells(29) E7; set destinationwells(30) E8; set destinationwells(31) E9; set
101 destinationwells(32) E10
102 set destinationwells(33) F2; set destinationwells(34) F3; set destinationwells(35) F4; set
103 destinationwells(36) F5
104 set destinationwells(37) F7; set destinationwells(38) F8; set destinationwells(39) F9; set
105 destinationwells(40) F10
106 set destinationwells(41) G2; set destinationwells(42) G3; set destinationwells(43) G4; set
107 destinationwells(44) G5
108 set destinationwells(45) G7; set destinationwells(46) G8; set destinationwells(47) G9; set
109 destinationwells(48) G10
110
111 # Set source plate format (Each well containing different drugs)
112 set sourcewells(1) A1; set sourcewells(2) A2; set sourcewells(3) A3; set sourcewells(4) A4; set
113 sourcewells(5) A5; set sourcewells(6) A6
114 set sourcewells(7) B1; set sourcewells(8) B2; set sourcewells(9) B3; set sourcewells(10) B4 ; set
115 sourcewells(11) B5; set sourcewells(12) B6
116 set sourcewells(13) C1; set sourcewells(14) C2; set sourcewells(15) C3; set sourcewells(16) C4 ; set
117 sourcewells(17) C5; set sourcewells(18) C6
118 set sourcewells(19) D1; set sourcewells(20) D2
119
120 #Specify source wells containing PBS.
121 # It is required to reach same final volume in destination wells. Every destination well has 170microLiter
122 #of cell suspension before drug transfer. In case of two drug combination 10µl of drugs will be added in
123 #destination well to reach final volume of 200µl, it is required to add 20µl of PBS in it.
124 set pbswells(1) A6; set pbswells(2) B6; set pbswells(3) C6

```

```

125 set pbswells(4) D6; set pbswells(5) E6; set pbswells(6) F6
126 set pbswells(7) A5
127 vdi_create vdi1 "vdi_value"
128
129 # Specify excel sheet name
130 extref_init "EXCEL|Sheet1"
131
132 # No of wells in an experiments
133 set noofwells [extref_get "EXCEL|Sheet1|R1C20" ]
134
135 # Transfer volume in microLiters
136 set tvolume [extref_get "EXCEL|Sheet1|R1C21" ]
137
138 # Maximum number of drugs in a combination
139 set maxdrugs [extref_get "EXCEL|Sheet1|R1C22" ]
140
141
142 ##### Code to extract source and destination location from spread sheet and perform desired transfers
143
144 # Loop to read the drug numbers from the excel file and then move to transfer the drugs
145 for {set wells 0} {($wells < $noofwells)} {incr wells} {
146     set colno 1
147     set drugnumber [extref_get "EXCEL|Sheet1|R[expr $wells + 1]C$colno" ]
148     while { ( [string index $drugnumber 0] != "M") && ( $colno < maxdrugs )} {
149
150         # Instructions for Aspiration
151
152         # Move robot arm to source location
153         Move Abs [Coord $sourcedrug $sourcewells([string trim $drugnumber])] 55
154         #Aspirate blow out air
155         Move Rel T $blowoutair
156         # Move the tip down in source well
157         Move Abs Z $srcZ
158         # Aspirate
159         Move Rel T $move
160         # Keep tip in the source well for some time
161         Delay $Adelay
162         # Move robot arm and tip out of source well
163         Move Abs Z $src(SrcHt)
164
165         # Dispense instructions
166
167         #Move to destination location
168         Move Abs [Coord $destination $destinationwells($randomwells([expr $wells + 1]))] 50

```

```

169 #Move tip in the destination well
170     Move Abs Z $dstZ
171 #Dispense
172     Move Rel T [expr $move * -1]
173 #Blow out extra air
174     Move Rel T [expr $blowoutair * -1]
175 # Tip touch
176     Move Rel X 3
177     Move Rel X -3
178 # Move out of destination well
179     Move Abs Z $dst(DstHt)
180
181 # Replace the Tip
182     Tip attach save
183
184 # Increment and read next drug from next cell of spread sheet
185     incr colno
186
187     set drugnumber [extref_get "EXCEL|Sheet1|R[expr $wells + 1]C$colno" ]
188
189 }
190
191 if { $colno < maxdrugs } { #If PBS need to be added in the well
192
193 #Volume of PBS that will be added in the well
194     set pbsvolume [string index $drugnumber 1][string index $drugnumber 2]
195     set pbsvolume [expr int($pbsvolume)]
196     set totalpbs [extref_get "EXCEL|Sheet1|R[expr $wells+1]C[expr $colno+1 ]" ]
197
198 #Aspiration preparation
199     set pbsMove [expr $step * $pbsvolume]
200
201
202 # Aspirate
203     Move Abs [Coord $sourcemedium $pbswells([expr ($totalpbs/625) + 1])] 55
204     Move Rel T $blowoutair
205     Move Abs Z $srcZ
206     Move Rel T $pbsMove
207     Delay $Adelay
208     Move Abs Z $src(SrcHt)
209
210 # Dispense
211     Move Abs [Coord $destination $destinationwells( $randomwells([expr $wells + 1]))] 50
212     Move Abs Z $dstZ

```

```
213     Move Rel T [expr $pbsMove * -1]
214     Move Rel T [expr $blowoutair * -1]
215     Move Rel X 3
216     Move Rel X -3
217     Move Abs Z $dst(DstHt)
218
219     # Replace the Tip
220     Tip attach save
221     }
222 }
223 extref_end_all
224 vdi_destroy vdi1
```

## 2- Matlab® Code for prediction of IC10, IC20 values from concentration response data.

### Description:

```
1 % This code predicts the IC20 and IC10 values from concentration response data by fitting hill regression
2 %model. Graphs of fitted curve and IC10 and IC20 values are saved/written to a file (argument of the
3 %analyze function). The input of this program dose response data in the form of text file exported from
4 %graphpad prism®, present in the same directory that contain Matlab® program.
5 %More detailed description of how calculations are made is below:
6 %In order to estimate the IC20 values from dose response curve of selected drugs with cancer
7 %cell lines (DLD-1 for pilot experiment and HCT116 for main experiment) the following
8 %analysis was performed using
9 %the classical Hill model, here described as
10
```

$$%E = \frac{c^h}{c^h + (c_{50})^h}$$

```
11 %where E is the predicted drug effect, c is the drug concentration and  $c_{50}$  is the IC50 value, and
12 %the Hill coefficient h determines the slope of dose response. The two parameters  $c_{50}$  and h
13 %were fitted by using a nonlinear least-squares-fitting by means of the built-in Matlab®
14 %function fit using default settings (which means employment of a built-in Trust-Region
15 %method) together with the constraints that  $c_{50}$  and h are non-negative.
16 %After estimating  $c_{50}$  and h using dose-response data, the IC20 value was determined from the
17 % inverse Hill equation as (please see line 142 of code )
18
19 % $c = c_{50} \left( \frac{1-E}{E} \right)^{\frac{1}{h}}$ 
20
21 %To determine the IC20 value we used E=0.8.
```

```

22 analyze("results.csv")

23 function analyze(varargin)
24 % analyze
25 % Computes concentrations of SI% effect 10 and 20 from txt-files
26 % exported from Graphprad Prism. Result is stored in "results.csv".
27 %
28 % analyze(filename)
29 % Stores result in "filename" in the current. NB: Avoid .txt ending.
30
31 if nargin == 0
32     output = 'results.csv';
33 else
34     output = varargin{1};
35 end
36
37 files = dir('*.*txt');
38 nFile = length(files);
39
40 % fid of file used to store result
41 fid = fopen(output, 'w');
42
43 for iFile = 1:nFile
44     process(files(iFile).name, fid);
45 end
46
47 fclose(fid);
48 end
49
50 function process(file, fid)
51 % importfile creates variables "data" containing numeric
52 % data and "textdata" containing the headers, i.e. cell line
53 importfile(file);
54
55 % Pad data to original number of columns (import ignores trailing
56 % empty columns)
57
58 nPadColumn = length(textdata) - size(data,2);
59 nRow = size(data,1);
60 data = [data, NaN(nRow, nPadColumn)];
61
62 % Fit curves
63 cellLines = setdiff(unique(textdata), textdata{1});
64 nCell = length(cellLines);
65 conc = data(:,1);
66 for iCell = 1:nCell
67
68     si = data(:,strcmp(cellLines{iCell}, textdata));
69     [h, ic50] = hillfit(conc, si);
70
71
72     % The files are given a meaningful name(drugname + cell line) and
73     % saved in tiff format.

```

```

74     title(['filename = ' file , ' Cell line=' , cellLines{iCell} ])
75     restChars = {'\','/'};
76     saveas(gcf, regexprep(['filename = ' file , 'Cell line=' , cellLines{iCell}], restChars, '-'), 'tiff' )
77
78     ic10 = invhill(h, ic50, .9);
79     ic20 = invhill(h, ic50, .8);
80     res(1,iCell) = ic10;
81     res(2,iCell) = ic20;
82 end
83
84
85 % Print out result
86 fprintf(fid, file);
87 for iCell = 1:nCell
88     fprintf(fid, '%s', cellLines{iCell});
89 end
90 fprintf(fid, '\n');
91
92 fprintf(fid, 'IC10');
93 for iCell = 1:nCell
94     fprintf(fid, '%d', res(1, iCell));
95 end
96 fprintf(fid, '\n');
97
98
99 fprintf(fid, 'IC20')
100 for iCell = 1:nCell
101     fprintf(fid, '%d', res(2, iCell));
102 end
103 fprintf(fid, '\n');
104 end
105
106 function [h, ic50] = hillfit(conc, si)
107
108 % Reformat data for curvefit
109 nColumn = size(si, 2);
110 x = repmat(conc, nColumn, 1);
111 y = si(:);
112 filter = not(isnan(y));
113 x = x(filter);
114 % Rescale SI% to SI
115 y = y(filter)/100;
116
117
118 f = fitype('c^h/(c^h + x^h)');
119 s = fitoptions('Method','NonlinearLeastSquares',...
120     'Lower', [0, 0],...
121     'Startpoint',[mean(conc) 1]);
122
123
124 regression = fit(x, y, f, s);
125
126 % The semilog graphs are produced and then curve is fitted.

```



```

127 %figure; Uncomment to enable popup of the figures
128 semilogx(x,y);
129 hold on
130 plot(regression,x,y)
131 hold off
132
133 coeffs = coeffvalues(regression);
134 ic50 = coeffs(1);
135 h = coeffs(2);
136
137 end
138
139 function ic = invhill(h, ic50, f)
140     ic = ic50*((1-f)/f)^(1/h);
141 end
142
143 function importfile(fileToRead1)
144 %IMPORTFILE(FILETOREAD1)
145 % Imports data from the specified file
146 % FILETOREAD1: file to read
147
148 % Import the file
149 newData1 = importdata(fileToRead1);
150
151 % Create new variables in the base workspace from those fields.
152 vars = fieldnames(newData1);
153 for i = 1:length(vars)
154     assignin('caller', vars{i}, newData1.(vars{i}));
155 end

```

# Supplementary Methods Part III: In vitro discovery of promising anti-cancer drug combinations using maximization of a therapeutic index

M. Kashif<sup>1</sup>, C. Andersson<sup>1</sup>, S. Hassan<sup>1</sup>, H. Karlsson<sup>1</sup>, W. Senkowski<sup>1</sup>, M. Fryknäs<sup>1</sup>,  
P. Nygren<sup>2</sup>, R. Larsson<sup>1</sup>, M.G. Gustafsson<sup>1,\*</sup>

<sup>1</sup>Uppsala University, Dept. Medical Sciences Cancer Pharmacology and Computational  
Medicine, Academic Hospital, 751 85 Uppsala, Sweden

<sup>2</sup>Uppsala University, Dept of Radiology, Oncology and Radiation Science, Academic  
Hospital, SE-751 85 Uppsala, Sweden.

\*Corresponding author: Mats.Gustafsson@medsci.uu.se

## Brief Description:

This supplement describes t-test for therapeutic synergy.

When testing for therapeutic synergy we are whether the difference between two differences are equal or not (i.e. if the therapeutic index for the combination is equal to that of the best single drug).

Assuming all measurements are distributed Normal with equal variance  $\sigma^2$  we can describe the hypothesis test as testing the null hypothesis  $H_0: \mu_1 - \mu_2 = 0$  vs the alternative  $H_1: \mu_1 - \mu_2 > 0$  where  $\mu_1, \mu_2$  are the true TI values of combination and best single respectively. The TI comparison thus corresponds to  $Y_1 - Y_2$  where

$$Y_1 = \bar{X}_1 - \bar{X}_2$$
$$Y_2 = \bar{X}_3 - \bar{X}_4$$

and  $\bar{X}_i$  is the mean over a set of replicates for the different cell lines and combo and single respectively and  $\mu_i = E[Y_i]$ .

## Test

Under the assumption of equal variance of the measurements we find that  $Y_1 - Y_2 \sim Normal(\mu_1 - \mu_2, \sigma \sqrt{\frac{1}{n_1} + \frac{1}{n_2} + \frac{1}{n_3} + \frac{1}{n_4}})$ , so

$$\frac{Y_1 - Y_2}{\sqrt{\sigma^2 \left( \frac{1}{n_1} + \frac{1}{n_2} + \frac{1}{n_3} + \frac{1}{n_4} \right)}} \sim Normal(0,1) \quad (*)$$

when  $H_0$  is true. However,  $\sigma^2$  is unknown so it cannot be used as a test statistic, and we will need to use some t-statistic.

Now, a variable  $T$  is t-distributed with  $v$  degrees of freedom if  $T = \frac{Z}{\sqrt{V/v}}$  where  $Z$  is Normal(0,1), and  $V$  is  $\chi_v^2$ . Given that

$$\frac{\sum_i (X_i - \bar{X})^2}{\sigma^2} \sim \chi_{n-1}^2$$

when  $n$  is the number of observations  $X_i$  all of which are iid Normal( $\mu, \sigma$ ) note that the nominator is simply a constant times the sample variance, i.e.  $(n-1)S^2$ . Now consider a pooled sample variance obtained from our four sets of measurements above. Each set of replicates will have sample variance  $S_i^2$ , based on  $n_i$  replicates and we can compute a pooled estimate as

$$S_p^2 = \frac{\sum_i (n_i - 1) S_i^2}{\sum_i (n_i - 1)}$$

From the above and that a sum of independent chi-2 distributed stochastic variables is also chi2-distributed one has in our case that a sum of independent chi-2 distributed stochastic variables is also chi2-distributed one has in our case  $\frac{\sum_i (n_i - 1)}{\sigma^2} S_p^2 \sim \chi_{n_1 + n_2 + n_3 + n_4 - 4}^2$ . Dividing (\*) with the left hand side shows that

$$t = \frac{Y_1 - Y_2}{\sqrt{\frac{\sum_{j=1}^4 (n_j - 1) S_j^2}{\sum_{j=1}^4 (n_j - 1)} \sqrt{\left(\frac{1}{n_1} + \frac{1}{n_2} + \frac{1}{n_3} + \frac{1}{n_4}\right)}}} = \frac{Y_1 - Y_2}{\sqrt{S_p^2 \left(\frac{1}{n_1} + \frac{1}{n_2} + \frac{1}{n_3} + \frac{1}{n_4}\right)}}$$

is t-distributed with  $n_1 + n_2 + n_3 + n_4 - 4$  degrees of freedom. Thus the pooled variance  $S_p^2$  can be used together with the difference  $Y_1 - Y_2$  to determine a test statistic which is t-distributed with  $n_1 + n_2 + n_3 + n_4 - 4$  degrees of freedom from which a p-value for the stated  $H_0$  above can be computed.
